# Supplementary material for: Uptake and impact of the English National Health Service digital diabetes prevention programme: observational study
Source: PubMed Central journal article supplement — BMJ Open Diabetes Res Care. 2022 May 3;10(3):e002736. doi: 10.1136/bmjdrc-2021-002736 (PMC9066480; doi:10.1136/bmjdrc-2021-002736), 2022-05-03
Supplement: bmjdrc-2021-002736supp001.pdf [file bmjdrc-2021-002736supp001.pdf]

## Supplemental materials

**S1: Linear regression analyses for primary outcomes (weight change and HbA1c change) at 12 months for participants with complete case data**

|                       |       | Weight change (N=1,534) |                 |                 |         | HbA1c change (N=1,502) |                 |                 |         |
|-----------------------|-------|-------------------------|-----------------|-----------------|---------|------------------------|-----------------|-----------------|---------|
|                       |       | Coefficient             | 95% CI<br>lower | 95% CI<br>upper | P value | Coefficient            | 95% CI<br>lower | 95% CI<br>upper | P value |
| Baseline weight/HbA1c |       | -0.05                   | -0.08           | -0.03           | <0.001  | -0.38                  | -0.44           | -0.32           | <0.001  |
| Peer support          | No    |                         |                 |                 |         |                        |                 |                 |         |
|                       | Yes   | -4.47                   | -6.30           | -2.64           | <0.001  | -1.51                  | -2.40           | -0.62           | 0.001   |
| Wearables provided    | No    |                         |                 |                 |         |                        |                 |                 |         |
|                       | Yes   | -3.36                   | -4.72           | -2.01           | <0.001  | -0.49                  | -1.16           | 0.18            | 0.153   |
| Telephone service     | No    |                         |                 |                 |         |                        |                 |                 |         |
|                       | Yes   | -3.69                   | -5.67           | -1.71           | <0.001  | -1.04                  | -2.00           | -0.08           | 0.034   |
| Text service          | No    |                         |                 |                 |         |                        |                 |                 |         |
|                       | Yes   | 0.74                    | -0.35           | 1.82            | 0.182   | 0.67                   | 0.15            | 1.19            | 0.011   |
| Age group             | 18-44 |                         |                 |                 |         |                        |                 |                 |         |
|                       | 45-54 | -0.39                   | -1.57           | 0.78            | 0.515   | 0.19                   | -0.40           | 0.77            | 0.534   |
|                       | 55-64 | -1.75                   | -2.90           | -0.61           | 0.003   | 0.12                   | -0.45           | 0.70            | 0.669   |
|                       | 65-74 | -1.74                   | -2.96           | -0.53           | 0.005   | -0.03                  | -0.63           | 0.58            | 0.934   |
|                       | 75+   | -1.83                   | -3.34           | -0.32           | 0.017   | 0.35                   | -0.40           | 1.09            | 0.361   |

|                         |                        | Weight change (N=1,534) |                 |                 |         | HbA1c change (N=1,502) |                 |                 |         |
|-------------------------|------------------------|-------------------------|-----------------|-----------------|---------|------------------------|-----------------|-----------------|---------|
|                         |                        | Coefficient             | 95% CI<br>lower | 95% CI<br>upper | P value | Coefficient            | 95% CI<br>lower | 95% CI<br>upper | P value |
| Sex                     | Male                   |                         |                 |                 |         |                        |                 |                 |         |
|                         | Female                 | -0.22                   | -0.82           | 0.38            | 0.468   | -0.01                  | -0.30           | 0.28            | 0.936   |
|                         | Indeterminate          | -0.77                   | -12.43          | 10.88           | 0.897   | -0.87                  | -6.47           | 4.74            | 0.761   |
| Ethnicity               | White                  |                         |                 |                 |         |                        |                 |                 |         |
|                         | Mixed                  | 0.83                    | -0.96           | 2.62            | 0.363   | -0.05                  | -0.93           | 0.83            | 0.918   |
|                         | Asian                  | 0.36                    | -0.73           | 1.44            | 0.519   | -0.22                  | -0.72           | 0.28            | 0.398   |
|                         | black                  | 0.10                    | -1.59           | 1.79            | 0.910   | 0.40                   | -0.45           | 1.25            | 0.359   |
|                         | other                  | 0.57                    | -3.87           | 5.02            | 0.800   | 1.48                   | -0.82           | 3.78            | 0.207   |
| Highest education level | No Qualifications      |                         |                 |                 |         |                        |                 |                 |         |
|                         | School leaver          | -0.60                   | -1.59           | 0.39            | 0.232   | -0.33                  | -0.80           | 0.15            | 0.181   |
|                         | Degree level           | -1.03                   | -2.06           | -0.01           | 0.048   | -0.28                  | -0.78           | 0.22            | 0.268   |
| Deprivation quintile    | IMD 1 (most deprived)  |                         |                 |                 |         |                        |                 |                 |         |
|                         | IMD 2                  | 0.22                    | -0.86           | 1.29            | 0.693   | 0.26                   | -0.26           | 0.79            | 0.321   |
|                         | IMD 3                  | 0.37                    | -0.73           | 1.46            | 0.509   | 0.13                   | -0.40           | 0.66            | 0.632   |
|                         | IMD 4                  | -1.08                   | -2.16           | -0.01           | 0.048   | 0.11                   | -0.41           | 0.64            | 0.670   |
|                         | IMD 5 (least deprived) | 0.62                    | -0.53           | 1.77            | 0.289   | -0.13                  | -0.70           | 0.43            | 0.637   |

|              |                                  | Weight change (N=1,534) |                 |                 |         | HbA1c change (N=1,502) |                 |                 |         |
|--------------|----------------------------------|-------------------------|-----------------|-----------------|---------|------------------------|-----------------|-----------------|---------|
|              |                                  | Coefficient             | 95% CI<br>lower | 95% CI<br>upper | P value | Coefficient            | 95% CI<br>lower | 95% CI<br>upper | P value |
| Rural/urban  | Mainly rural                     |                         |                 |                 |         |                        |                 |                 |         |
|              | Largely rural                    | -0.17                   | -1.24           | 0.89            | 0.753   | 1.59                   | 1.09            | 2.09            | <0.001  |
|              | Urban with significant rural     | -0.62                   | -1.87           | 0.64            | 0.335   | 1.00                   | 0.41            | 1.59            | 0.001   |
|              | Urban with city and town         | 0.45                    | -0.88           | 1.79            | 0.506   | 0.71                   | 0.08            | 1.33            | 0.028   |
|              | Urban with major and conurbation | 0.87                    | -0.28           | 2.03            | 0.136   | 0.66                   | 0.11            | 1.20            | 0.019   |
| BMI grouping | Healthy                          |                         |                 |                 |         |                        |                 |                 |         |
|              | Overweight                       | -0.80                   | -1.83           | 0.24            | 0.130   | 0.17                   | -0.31           | 0.65            | 0.485   |
|              | Obese                            | -0.77                   | -1.99           | 0.45            | 0.217   | 0.41                   | -0.06           | 0.89            | 0.086   |
|              | constant                         | 3.19                    | 0.52            | 5.87            | 0.019   | -1.92                  | -3.22           | -0.61           | 0.004   |

\*Provider and Location not included due to multicollinearity

**S2: Secondary outcomes (weight change and HbA1c change) at 6 months for participants with complete case data**

|           |               | Weight change (N=1,811) |          |        |       |       |         | HbA1c change (N=1,696) |          |        |       |      |        |
|-----------|---------------|-------------------------|----------|--------|-------|-------|---------|------------------------|----------|--------|-------|------|--------|
|           |               | Mean                    |          |        |       |       |         | Mean                   |          |        |       |      |        |
|           |               | Mean                    | weight   | 95%    | 95%   | P     |         | Mean                   | HbA1c    | 95%    | 95%   | P    |        |
|           |               | N                       | baseline | change | CI    | CI    | value*  | N                      | baseline | change | CI    | CI   | value* |
|           |               |                         | weight   | at 6   | lower | upper |         | HbA1c                  | at 6     | lower  | upper |      |        |
|           |               |                         | months   | months |       |       |         | months                 | months   |        |       |      |        |
|           | Overall       | 1,811                   | 87.2     | -3.5   | -3.7  | -3.3  | n/a     | 1,696                  | 43.2     | -1.8   | -2.0  | -1.7 | n/a    |
| Age       | 18-44         | 210                     | 89.1     | -2.7   | -3.6  | -1.9  | 0.0777  | 204                    | 43.2     | -1.9   | -2.4  | -1.4 | 0.4563 |
|           | 45-54         | 338                     | 92.2     | -3.2   | -3.7  | -2.6  |         | 335                    | 43.3     | -1.7   | -2.0  | -1.4 |        |
|           | 55-64         | 591                     | 87.3     | -3.8   | -4.2  | -3.4  |         | 543                    | 43.1     | -1.9   | -2.1  | -1.6 |        |
|           | 65-74         | 522                     | 85.0     | -3.6   | -4.0  | -3.1  |         | 487                    | 43.3     | -2.0   | -2.2  | -1.7 |        |
|           | 75+           | 150                     | 80.3     | -3.9   | -4.6  | -3.2  |         | 127                    | 43.4     | -1.4   | -2.0  | -0.9 |        |
| Sex       | Male          | 895                     | 87.6     | -3.4   | -3.8  | -3.0  | 0.6741  | 841                    | 43.2     | -1.9   | -2.1  | -1.7 | 0.7690 |
|           | Female        | 915                     | 86.8     | -3.6   | -3.9  | -3.3  |         | 854                    | 43.3     | -1.8   | -2.0  | -1.6 |        |
|           | Indeterminate | 1                       | 73.0     | -6.0   |       |       |         | 1                      | 46.0     | -1.0   |       |      |        |
| Ethnicity | White         | 1,413                   | 89.1     | -4.0   | -4.3  | -3.7  | <0.0001 | 1,289                  | 43.2     | -1.9   | -2.1  | -1.8 | 0.0202 |
|           | Mixed         | 51                      | 84.6     | -3.0   | -4.2  | -1.8  |         | 53                     | 42.9     | -2.1   | -2.9  | -1.3 |        |
|           | Asian         | 267                     | 76.7     | -1.5   | -1.9  | -1.1  |         | 265                    | 43.3     | -1.6   | -2.0  | -1.2 |        |

|                   |                        | Weight change (N=1,811) |        |        |        |        | HbA1c change (N=1,696) |          |        |        |        |      |        |
|-------------------|------------------------|-------------------------|--------|--------|--------|--------|------------------------|----------|--------|--------|--------|------|--------|
|                   |                        | Mean                    |        |        |        |        | Mean                   |          |        |        |        |      |        |
|                   |                        | Mean                    | weight | 95%    | 95%    | P      | Mean                   | HbA1c    | 95%    | 95%    | P      |      |        |
| N                 | baseline               | weight                  | change | CI     | CI     |        | N                      | baseline | change | CI     |        | CI   |        |
|                   |                        | weight                  | at 6   | lower  | upper  | value* | HbA1c                  | at 6     | lower  | upper  | value* |      |        |
|                   |                        | months                  | months | months | months |        | months                 | months   | months | months |        |      |        |
|                   | black                  | 71                      | 89.7   | -1.2   | -2.3   | 0.0    | 80                     | 43.7     | -1.0   | -1.6   | -0.3   |      |        |
|                   | other                  | 9                       | 85.4   | -1.7   | -5.6   | 2.3    | 9                      | 42.7     | -0.4   | -3.2   | 2.4    |      |        |
| Deprivation       | IMD 1 (most deprived)  | 294                     | 88.8   | -3.1   | -3.8   | -2.5   | 0.0002                 | 311      | 43.5   | -1.9   | -2.2   | -1.6 | 0.1912 |
|                   | IMD 2                  | 355                     | 88.4   | -2.7   | -3.3   | -2.2   |                        | 337      | 43.3   | -1.8   | -2.1   | -1.5 |        |
|                   | IMD 3                  | 435                     | 86.9   | -3.2   | -3.7   | -2.7   |                        | 386      | 43.3   | -1.7   | -2.0   | -1.4 |        |
|                   | IMD 4                  | 390                     | 86.6   | -4.2   | -4.7   | -3.7   |                        | 358      | 43.1   | -1.7   | -2.0   | -1.4 |        |
|                   | IMD 5 (least deprived) | 337                     | 85.4   | -4.2   | -4.7   | -3.6   |                        | 304      | 42.9   | -2.2   | -2.6   | -1.8 |        |
| Highest education | No Qualifications      | 207                     | 86.7   | -2.8   | -3.5   | -2.1   | 0.0261                 | 193      | 43.4   | -1.5   | -1.9   | -1.1 | 0.2783 |
|                   | School leaver          | 910                     | 87.5   | -3.4   | -3.7   | -3.0   |                        | 875      | 43.3   | -1.9   | -2.1   | -1.7 |        |
|                   | Degree level           | 694                     | 86.9   | -3.9   | -4.2   | -3.5   |                        | 628      | 43.1   | -1.9   | -2.2   | -1.7 |        |
| BMI               | Healthy                | 204                     | 65.7   | -2.3   | -2.8   | -1.8   | 0.0002                 | 198      | 43.0   | -2.2   | -2.6   | -1.8 | 0.1857 |
|                   | Obese                  | 953                     | 98.1   | -3.9   | -4.3   | -3.5   |                        | 897      | 43.4   | -1.8   | -2.0   | -1.6 |        |
|                   | Overweight             | 654                     | 77.9   | -3.3   | -3.6   | -3.0   |                        | 601      | 43.1   | -1.8   | -2.1   | -1.6 |        |

|                    |                                  | Weight change (N=1,811) |          |        |       |       |         | HbA1c change (N=1,696) |          |        |      |      |        |
|--------------------|----------------------------------|-------------------------|----------|--------|-------|-------|---------|------------------------|----------|--------|------|------|--------|
|                    |                                  | Mean                    |          |        |       |       |         | Mean                   |          |        |      |      |        |
|                    |                                  | Mean                    | weight   | 95%    | 95%   | P     |         | Mean                   | HbA1c    | 95%    | 95%  | P    |        |
|                    |                                  | N                       | baseline | change | CI    | CI    | value*  | N                      | baseline | change | CI   | CI   | value* |
|                    |                                  | weight                  | at 6     | lower  | upper | HbA1c |         | at 6                   | lower    | upper  |      |      |        |
|                    |                                  | months                  |          |        |       |       |         | months                 |          |        |      |      |        |
| Rural/urban        | Mainly rural                     | 233                     | 88.5     | -3.9   | -4.7  | -3.2  | <0.0001 | 210                    | 43.7     | -2.3   | -2.7 | -1.9 | 0.0003 |
|                    | Largely rural                    | 379                     | 88.9     | -3.4   | -3.9  | -2.9  |         | 320                    | 43.3     | -1.5   | -1.8 | -1.2 |        |
|                    | Urban with significant rural     | 180                     | 87.2     | -4.1   | -4.9  | -3.3  |         | 160                    | 42.3     | -1.4   | -1.9 | -0.9 |        |
|                    | Urban with city and town         | 473                     | 86.9     | -4.9   | -5.4  | -4.4  |         | 387                    | 43.2     | -2.3   | -2.6 | -2.0 |        |
|                    | Urban with major and conurbation | 546                     | 85.6     | -2.0   | -2.4  | -1.6  |         | 619                    | 43.3     | -1.7   | -2.0 | -1.5 |        |
| Peer support       | No                               | 1,171                   | 86.9     | -3.0   | -3.2  | -2.7  | <0.0001 | 1,134                  | 43.1     | -1.8   | -1.9 | -1.6 | 0.1556 |
|                    | Yes                              | 640                     | 87.7     | -4.4   | -4.9  | -4.0  |         | 562                    | 43.5     | -2.0   | -2.3 | -1.7 |        |
| Wearables provided | No                               | 1,362                   | 86.5     | -2.7   | -3.0  | -2.5  | <0.0001 | 1,363                  | 43.2     | -1.7   | -1.9 | -1.5 | 0.0002 |
|                    | Yes                              | 449                     | 89.2     | -5.8   | -6.4  | -5.3  |         | 333                    | 43.3     | -2.4   | -2.8 | -2.0 |        |
| Telephone service  | No                               | 759                     | 88.5     | -4.3   | -4.8  | -3.9  | <0.0001 | 681                    | 43.6     | -2.0   | -2.2 | -1.7 | 0.2335 |
|                    | Yes                              | 1,052                   | 86.2     | -2.9   | -3.2  | -2.6  |         | 1,015                  | 43.0     | -1.8   | -2.0 | -1.6 |        |

|              |            | Weight change (N=1,811) |          |        |       |       |         | HbA1c change (N=1,696) |          |        |      |      |         |
|--------------|------------|-------------------------|----------|--------|-------|-------|---------|------------------------|----------|--------|------|------|---------|
|              |            | Mean                    |          |        |       |       |         | Mean                   |          |        |      |      |         |
|              |            | Mean                    | weight   | 95%    | 95%   | P     |         | Mean                   | HbA1c    | 95%    | 95%  | P    |         |
|              |            | N                       | baseline | change | CI    | CI    | value*  | N                      | baseline | change | CI   | CI   | value*  |
|              |            | weight                  | at 6     | lower  | upper | HbA1c |         | at 6                   | lower    | upper  |      |      |         |
|              |            | months                  |          |        |       |       |         | months                 |          |        |      |      |         |
| Text service | No         | 330                     | 86.3     | -2.9   | -3.4  | -2.4  | 0.0294  | 379                    | 43.7     | -2.3   | -2.6 | -2.0 | 0.0013  |
|              | Yes        | 1,481                   | 87.4     | -3.6   | -3.9  | -3.3  |         | 1,317                  | 43.1     | -1.7   | -1.9 | -1.5 |         |
| Provider     | Provider 1 | 119                     | 92.6     | -3.8   | -4.8  | -2.9  | <0.0001 | 119                    | 44.1     | -1.8   | -2.3 | -1.2 | <0.0001 |
|              | Provider 2 | 330                     | 86.3     | -2.9   | -3.4  | -2.4  |         | 379                    | 43.7     | -2.3   | -2.6 | -2.0 |         |
|              | Provider 3 | 310                     | 87.5     | -2.2   | -2.8  | -1.6  |         | 348                    | 43.9     | -1.5   | -1.8 | -1.2 |         |
|              | Provider 4 | 330                     | 87.9     | -6.6   | -7.2  | -5.9  |         | 214                    | 42.8     | -2.8   | -3.3 | -2.3 |         |
|              | Provider 5 | 722                     | 86.2     | -2.9   | -3.2  | -2.5  |         | 636                    | 42.6     | -1.5   | -1.7 | -1.2 |         |
| Location     | Location 1 | 204                     | 85.5     | -6.4   | -7.2  | -5.7  | <0.0001 | 153                    | 43.2     | -3.1   | -3.7 | -2.4 | <0.0001 |
|              | Location 2 | 158                     | 89.3     | -3.3   | -4.1  | -2.4  |         | 159                    | 41.4     | -1.3   | -1.8 | -0.9 |         |
|              | Location 3 | 189                     | 82.6     | -1.4   | -1.9  | -0.8  |         | 184                    | 41.7     | -1.1   | -1.7 | -0.5 |         |
|              | Location 4 | 168                     | 88.7     | -3.8   | -4.7  | -3.0  |         | 141                    | 43.4     | -1.8   | -2.3 | -1.4 |         |
|              | Location 5 | 159                     | 85.7     | -3.0   | -3.6  | -2.3  |         | 159                    | 43.5     | -2.0   | -2.4 | -1.6 |         |
|              | Location 6 | 189                     | 87.8     | -1.8   | -2.6  | -1.1  |         | 220                    | 44.1     | -1.5   | -1.9 | -1.1 |         |

|            | Weight change (N=1,811) |          |        |       |        | HbA1c change (N=1,696) |          |        |       |        |
|------------|-------------------------|----------|--------|-------|--------|------------------------|----------|--------|-------|--------|
|            | Mean                    |          |        |       |        | Mean                   |          |        |       |        |
|            | Mean                    | weight   | 95%    | 95%   | P      | Mean                   | HbA1c    | 95%    | 95%   | P      |
|            | N                       | baseline | change | CI    | CI     | N                      | baseline | change | CI    | CI     |
|            |                         | weight   | at 6   | lower | upper  |                        | HbA1c    | at 6   | lower | upper  |
|            |                         |          | months |       |        |                        |          | months |       |        |
|            |                         |          |        |       | value* |                        |          |        |       | value* |
| Location 7 | 494                     | 88.1     | -3.5   | -4.0  | -3.1   | 412                    | 43.9     | -1.8   | -2.0  | -1.5   |
| Location 8 | 171                     | 86.8     | -2.9   | -3.6  | -2.2   | 220                    | 43.8     | -2.5   | -2.9  | -2.2   |
| Location 9 | 79                      | 91.1     | -7.0   | -8.3  | -5.6   | 48                     | 41.3     | -1.5   | -2.2  | -0.7   |

\*Analysis of Variance



**S3: Linear regression analyses for secondary outcomes (weight change and HbA1c change) at 6 months for participants with complete case data**

|                       |       | Weight change (N=1,811) |                 |                 |         | HbA1c change (N=1,696) |                 |                 |         |
|-----------------------|-------|-------------------------|-----------------|-----------------|---------|------------------------|-----------------|-----------------|---------|
|                       |       | Coefficient             | 95% CI<br>lower | 95% CI<br>upper | P value | Coefficient            | 95% CI<br>lower | 95% CI<br>upper | P value |
| Baseline weight/HbA1c |       | -0.05                   | -0.07           | -0.03           | <0.001  | -0.35                  | -0.40           | -0.29           | <0.001  |
| Peer support          | No    |                         |                 |                 |         |                        |                 |                 |         |
|                       | Yes   | -3.58                   | -4.84           | -2.33           | <0.001  | -1.41                  | -2.22           | -0.61           | <0.001  |
| Wearables provided    | No    |                         |                 |                 |         |                        |                 |                 |         |
|                       | Yes   | -3.92                   | -4.85           | -2.99           | <0.001  | -1.55                  | -2.15           | -0.95           | <0.001  |
| Telephone service     | No    |                         |                 |                 |         |                        |                 |                 |         |
|                       | Yes   | -3.48                   | -4.84           | -2.13           | <0.001  | -1.79                  | -2.65           | -0.93           | <0.001  |
| Text service          | No    |                         |                 |                 |         |                        |                 |                 |         |
|                       | Yes   | 0.55                    | -0.27           | 1.37            | 0.191   | 0.35                   | -0.15           | 0.85            | 0.172   |
| Age group             | 18-44 |                         |                 |                 |         |                        |                 |                 |         |
|                       | 45-54 | -0.03                   | -0.90           | 0.84            | 0.952   | 0.33                   | -0.20           | 0.86            | 0.220   |
|                       | 55-64 | -0.75                   | -1.58           | 0.08            | 0.077   | 0.25                   | -0.25           | 0.76            | 0.327   |
|                       | 65-74 | -0.62                   | -1.51           | 0.27            | 0.173   | 0.29                   | -0.25           | 0.83            | 0.291   |
|                       | 75+   | -1.04                   | -2.17           | 0.09            | 0.070   | 0.94                   | 0.23            | 1.64            | 0.010   |
| Sex                   | Male  |                         |                 |                 |         |                        |                 |                 |         |

|                         |                        | Weight change (N=1,811) |                 |                 |         | HbA1c change (N=1,696) |                 |                 |         |
|-------------------------|------------------------|-------------------------|-----------------|-----------------|---------|------------------------|-----------------|-----------------|---------|
|                         |                        | Coefficient             | 95% CI<br>lower | 95% CI<br>upper | P value | Coefficient            | 95% CI<br>lower | 95% CI<br>upper | P value |
|                         | Female                 | -0.42                   | -0.87           | 0.04            | 0.072   | 0.05                   | -0.23           | 0.34            | 0.706   |
|                         | Indeterminate          | -4.67                   | -14.26          | 4.93            | 0.340   | 1.58                   | -4.21           | 7.37            | 0.593   |
| Ethnicity               | White                  |                         |                 |                 |         |                        |                 |                 |         |
|                         | Mixed                  | 0.50                    | -0.91           | 1.91            | 0.488   | -0.19                  | -1.02           | 0.64            | 0.654   |
|                         | Asian                  | 0.83                    | 0.00            | 1.65            | 0.050   | 0.29                   | -0.18           | 0.77            | 0.229   |
|                         | black                  | 1.81                    | 0.55            | 3.07            | 0.005   | 1.04                   | 0.32            | 1.77            | 0.005   |
|                         | other                  | 1.36                    | -1.87           | 4.58            | 0.410   | 1.34                   | -0.61           | 3.28            | 0.179   |
| Highest education level | No Qualifications      |                         |                 |                 |         |                        |                 |                 |         |
|                         | School leaver          | -0.41                   | -1.15           | 0.34            | 0.282   | -0.35                  | -0.81           | 0.12            | 0.142   |
|                         | Degree level           | -0.83                   | -1.61           | -0.05           | 0.036   | -0.45                  | -0.94           | 0.03            | 0.068   |
| Deprivation quintile    | IMD 1 (most deprived)  |                         |                 |                 |         |                        |                 |                 |         |
|                         | IMD 2                  | 0.52                    | -0.27           | 1.30            | 0.195   | 0.04                   | -0.43           | 0.52            | 0.853   |
|                         | IMD 3                  | 0.39                    | -0.41           | 1.19            | 0.342   | 0.17                   | -0.32           | 0.66            | 0.497   |
|                         | IMD 4                  | -0.33                   | -1.13           | 0.46            | 0.415   | 0.15                   | -0.33           | 0.63            | 0.544   |
|                         | IMD 5 (least deprived) | 0.42                    | -0.43           | 1.27            | 0.331   | -0.25                  | -0.77           | 0.27            | 0.345   |
| Rural/urban             | Mainly rural           |                         |                 |                 |         |                        |                 |                 |         |

|              |                                  | Weight change (N=1,811) |                 |                 |         | HbA1c change (N=1,696) |                 |                 |         |
|--------------|----------------------------------|-------------------------|-----------------|-----------------|---------|------------------------|-----------------|-----------------|---------|
|              |                                  | Coefficient             | 95% CI<br>lower | 95% CI<br>upper | P value | Coefficient            | 95% CI<br>lower | 95% CI<br>upper | P value |
|              | Largely rural                    | 0.82                    | 0.01            | 1.63            | 0.048   | 0.67                   | 0.15            | 1.19            | 0.012   |
|              | Urban with significant rural     | 0.15                    | -0.83           | 1.13            | 0.764   | 0.66                   | 0.03            | 1.29            | 0.039   |
|              | Urban with city and town         | 1.18                    | 0.19            | 2.17            | 0.020   | 0.55                   | -0.07           | 1.18            | 0.080   |
|              | Urban with major and conurbation | 1.22                    | 0.32            | 2.12            | 0.008   | 0.32                   | -0.24           | 0.88            | 0.266   |
| BMI grouping | Healthy                          |                         |                 |                 |         |                        |                 |                 |         |
|              | Overweight                       | -0.62                   | -1.42           | 0.18            | 0.129   | 0.27                   | -0.20           | 0.75            | 0.259   |
|              | Obese                            | -0.59                   | -1.52           | 0.34            | 0.214   | 0.41                   | -0.06           | 0.87            | 0.086   |
|              | constant                         | 0.83                    | -1.11           | 2.77            | 0.402   | -1.13                  | -2.35           | 0.09            | 0.069   |

\*Provider and Location not included due to multicollinearity
